# Supplementary material for: Intermediates in the reduction of the antituberculosis drug PA-824, (6S)-2-nitro-6-{[4-(trifluoromethoxy)benzyl]oxy}-6,7-dihydro-5H-imidazo[2,1-b][1,3]oxazine, in aqueous solution
Source: Royal Society of Chemistry journal article supplement (doi:10.1039/b801859f), 2008-01-01
Supplement: b801859f.pdf [file b801859f.pdf]

## Intermediates in the reduction of the antituberculosis drug PA-824, (6*S*)-2-nitro-6-{{4-(trifluoromethoxy)benzyl}oxy}-6,7-dihydro-5*H*-imidazo[2,1-*b*][1,3]oxazine, in aqueous solution.

Robert F. Anderson, Sujata S. Shinde, Andrej Maroz, Maruta Boyd, Brian D. Palmer, and William A. Denny

### Supplementary Data

Method: UB3LYP/6-31G(d,p)

Isotropic Fermi Contact Couplings for PA-824 radical anion (spin=2, charge=-1)

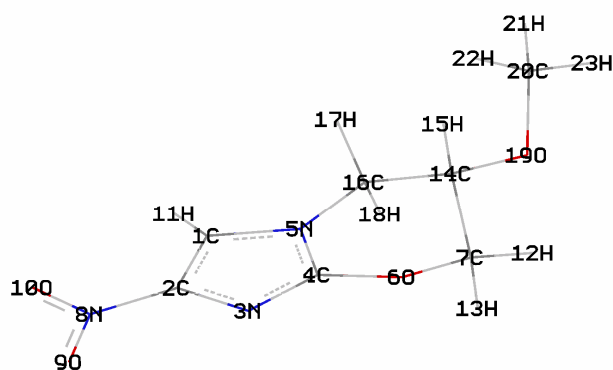

| Atom     | a.u.     | MegaHertz | Gauss    | 10 <sup>-4</sup> cm <sup>-1</sup> |
|----------|----------|-----------|----------|-----------------------------------|
| 1 C(13)  | 0.02929  | 32.92502  | 11.74847 | 10.98261                          |
| 2 C(13)  | -0.01292 | -14.52537 | -5.18301 | -4.84514                          |
| 3 N(14)  | 0.00314  | 1.01455   | 0.36202  | 0.33842                           |
| 4 C(13)  | -0.00725 | -8.14949  | -2.90794 | -2.71838                          |
| 5 N(14)  | 0.00398  | 1.28615   | 0.45893  | 0.42901                           |
| 6 O(17)  | -0.00190 | 1.15317   | 0.41148  | 0.38465                           |
| 7 C(13)  | -0.00071 | -0.79286  | -0.28291 | -0.26447                          |
| 8 N(14)  | 0.04528  | 14.63141  | 5.22085  | 4.88051                           |
| 9 O(17)  | 0.03696  | -22.40773 | -7.99563 | -7.47441                          |
| 10 O(17) | 0.02911  | -17.64850 | -6.29742 | -5.88691                          |
| 11 H(1)  | -0.00546 | -24.42359 | -8.71494 | -8.14683                          |
| 12 H(1)  | 0.00016  | 0.70917   | 0.25305  | 0.23656                           |
| 13 H(1)  | 0.00005  | 0.22430   | 0.08004  | 0.07482                           |
| 14 C(13) | -0.00073 | -0.82025  | -0.29268 | -0.27361                          |
| 15 H(1)  | 0.00014  | 0.62072   | 0.22149  | 0.20705                           |
| 16 C(13) | -0.00212 | -2.37984  | -0.84919 | -0.79383                          |
| 17 H(1)  | 0.00137  | 6.11767   | 2.18294  | 2.04063                           |
| 18 H(1)  | 0.00236  | 10.54397  | 3.76235  | 3.51709                           |
| 19 O(17) | 0.00177  | -1.07133  | -0.38228 | -0.35736                          |
| 20 C(13) | 0.00246  | 2.76291   | 0.98588  | 0.92161                           |
| 21 H(1)  | -0.00002 | -0.10613  | -0.03787 | -0.03540                          |
| 22 H(1)  | -0.00002 | -0.08752  | -0.03123 | -0.02919                          |
| 23 H(1)  | 0.00001  | 0.06435   | 0.02296  | 0.02147                           |
